# Supplementary material
Source: Research Square preprint supplement (doi:10.21203/rs.3.rs-9639807/v1)
Supplement: Supplementary file 1 [file 544c5bb712c21f6211c184bd.docx]

**Supplementary Material**

**for**

**Selective Phonon-Excitation Controls Transient Magnetization in Monolayer Transition Metal Dichalcogenides**

Jinhong Xu1,2, Youyou Tu2,3, Zhenfa Zheng2,3, Qijing Zheng1,3,4*, and Jin Zhao1,2,3,5*

1 Hefei National Laboratory, University of Science and Technology of China, Hefei, Anhui 230026, China

2 ICQD/Hefei National Research Center for Physical Sciences at the Microscale, University of Science and Technology of China, Hefei, Anhui 230026, China

3 Department of Physics, University of Science and Technology of China, Hefei, Anhui 230026, China

4 Key Laboratory of Precision and Intelligent Chemistry, University of Science and Technology of China, Hefei, Anhui 230026, China

5Department of Physics and Astronomy, University of Pittsburgh, Pittsburgh, Pennsylvania 15260, USA

Email:

* [zqj@ustc.edu.cn,](mailto:zqj@ustc.edu.cn,) zhaojin@ustc.edu.cn

1. **Method**

The simulation in this paper adopts NMAD_*k* approach 1. In this method, the electron wavefunction follows the time-dependent Schrödinger equation (TDSE)

,

where is the electronic Hamiltonian. The wavefunction can be expanded using the Kohn–Sham orbitals of the equilibrium atomic configuration

,

where the Kohn-Sham orbital , with band index *n* and momentum ***k*,** is the eigenstate of the equilibrium configuration . The electronic Hamiltonian can be separated into two parts:

,

where is the Hamiltonian under the equilibrium structure, and is the variation of the potential induced by nuclear displacement. Combining the equations (1)-(3), we can get coefficient evolution equation:

,

where the and are the diagonal energy matrix element and e-ph coupling matrix element. Under harmonic approximation, can be rewritten as

,

where N is the number of unite cells according to the Born-von Karman boundary conditions, is the zero-point displacement amplitude of the corresponding phonon vibration mode with momentum ***q*** in branch , and is the e-ph coupling matrix element which can be expressed as

,

can be expressed in terms of phonon populations as

,

where the initial population of phonons is given by the Bose-Einstein distribution . Finally, fewest-switches surface hopping (FSSH) is applied to include the stochastic factor of the carrier dynamics. We use a 1 as timestep for the electron dynamics and 1 fs timestep for the nuclear dynamics, thus the classical path approximation (CPA) is applied 2. For each initial energy, we sample 5000 valley electron (hole) trajectories and make an average to obtain the statistical properties of valley electron (hole) dynamics.

We carry out the calculation on a unit cell of monolayer MoS2 using the Quantum Espresso (QE) package. The electron-nuclear interactions are described fully-relativistic Ultrasoft pseudopotentials (USPPs), while the generalized gradient approximation (GGA) functional of Perdew-Burke-Ernzerhof (PBE) is used to describe the electronic exchange-correlation interactions3,4. The plane-wave kinetic-energy cutoff is set to 80 Ry and a Monkhorst-Pack k-point grid of 12×12×1 are sufficient for convergence. The properties of phonons are calculated on 12×12×1 q-pointy mesh using the density functional perturbation theory by QE. Subsequently, we use the Wannier90 code to interpolate efficiently the electronic band on the ultrafine k point grid 5,6. After the electronic and phonon calculations, the e−ph matrix elements can be given by the Perturbo package 7. For the simulation of valley electron (hole) relaxation, we performed it on on a dense 150×150×1 mesh for both q and k point grids. Moreover, the spin-orbit coupling is included at all steps of our calculations (DFT, DFPT, Wannier90 interpolation). The dynamics of electron (hole) across potential energy surfaces are governed by FSSH based on classical path approximation.

1. **The electron-phonon coupling**

The electron-phonon coupling (EPC) matrix element , summed over all phonon modes, between electronic states at the +K and -K spin valleys is significantly stronger in the conduction band than in the valence band, as shown in Fig. S1. Besides, within the conduction band, intra-valley EPC between different bands at the same K-valley is markedly stronger than its counterpart in the valence band. These factors facilitate an additional relaxation pathway for electrons: alongside direct intervalley scattering, electrons can undergo intra-valley spin-flip scattering followed by intervalley scattering. In contrast, holes are essentially restricted to undergoing spin-flip only as an accompanying process during intervalley scattering. These two mechanisms collectively contribute to the faster intervalley relaxation rate observed for electrons compared to holes.

Furthermore, we find that EPC between electronic states of opposite spin is significantly weaker than EPC between states of the same spin. This disparity promotes a relaxation hierarchy: both electrons and holes preferentially undergo relaxation within their initial spin states before spin-flip scattering occurs.

In the final part, we further elucidate the dominant phonon-mode contributions to the distinct relaxation channels of electrons and holes. As shown in Fig. 2 of the main text, for electrons, four scattering processes are allowed, namely intravalley spin-conserving scattering, intravalley spin-flip scattering, intervalley spin-conserving scattering, and intervalley spin-flip scattering. The intravalley spin-conserving and intravalley spin-flip channels are mainly contributed by the LA@Γ and ZO1@Γ phonon modes. By contrast, the intervalley spin-conserving and intervalley spin-flip channels are predominantly governed by the TA@K and LO2@K phonon modes. For holes, only two scattering processes are involved, namely intravalley spin-conserving scattering and intervalley spin-flip scattering. The intravalley spin-conserving channel is mainly contributed by the LA@Γ and TA@Γ phonon modes, whereas the intervalley spin-flip channel is dominated by the LA@K and TO2@K phonon modes.


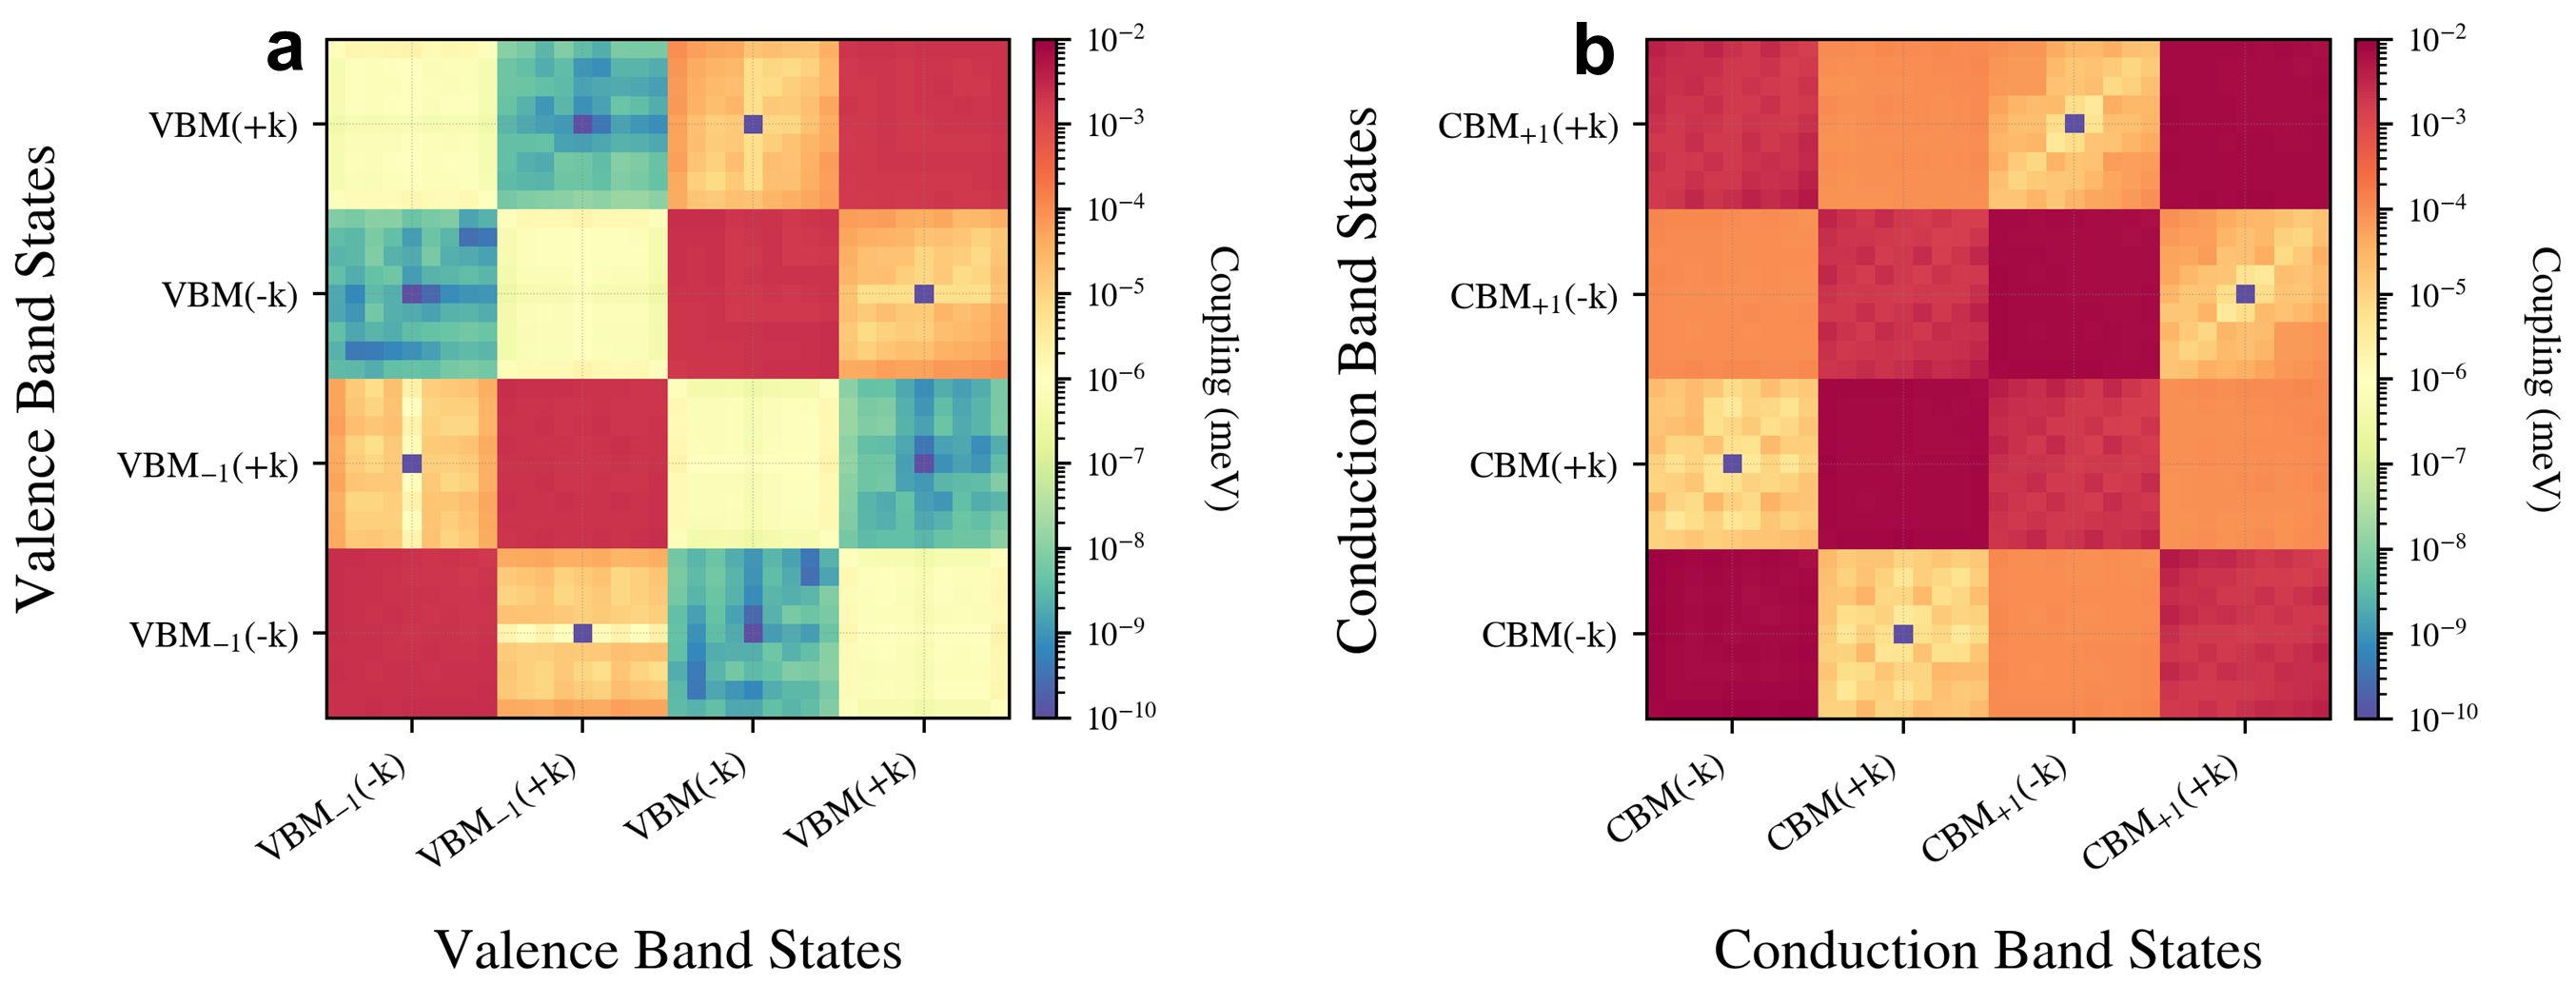


**Figure S1. The electron-phonon coupling.** (a) The electron-phonon coupling between electronic states around the ±K spin valleys, for (a) the valence band maximum (VBM) and (b) the conduction band minimum (CBM).

1. **Symmetry selection rules for intervalley valley scattering**

Group theory provides a powerful framework for understanding the key features of phonon absorption and emission during electron relaxation. Phonon-assisted electron scattering requires a nonzero electron-phonon coupling matrix element, which imposes strict symmetry constraints: the irreducible representations (irreps) of the electronic states must align with those of the vibrational states. The selection rules for phonon-assisted intervalley electron scattering are expressed as

,

where *K* denotes the irreps of groups given in Table S1 and * means complex conjugation. For monolayer MoS2, the VBM at +K and Γ transform as , whereas at the CBM, the -K valley and +K valley transform as and , respectively 8-11. The vibrational frequencies and irreducible representations of the relevant phonon modes at the K and Γ points are provided in Table 2. For intervalley scattering of holes at valence bands from the +K valley to the -K valley or from the +K valley to the Γ valley, the selection rule is , which indicates that the absorption (emission) of LA and TO2 phonons is strongly enhanced at the +K (-K) valley. Conversely, the intervalley scattering in the conduction bands is mediated by the absorption (emission) of LO2 phonon at +K (-K), due to the selection rule for electrons at conduction bands from the +K valley to the -K valley. It notes that during electron scattering between the ±K valleys, the transverse acoustic (TA) phonon mode experiences considerable excitation, where the selection rule is relaxed due to lower symmetry of the states involved.

Table S1: Character table of the point group ()

|  | *E* |  |  |  |  |  |
| --- | --- | --- | --- | --- | --- | --- |
|  | 1 | 1 | 1 | 1 | 1 | 1 |
|  | 1 | 1 | 1 | -1 | -1 | -1 |
|  | 1 |  |  | 1 |  |  |
|  | 1 |  |  | 1 |  |  |
|  | 1 |  |  | -1 |  |  |
|  | 1 |  |  | -1 |  |  |

Table S2: Phonon frequency (in meV) at Γ and K and the irreducible representation of thephonon eigenvectors.

| Branch |  |  |  |  |
| --- | --- | --- | --- | --- |
| ZA | 0 |  | 22.3 |  |
| TA | 0 |  | 23.0 |  |
| LA | 0 |  | 29.1 |  |
| TO1 | 35.4 |  | 40.1 |  |
| LO1 | 35.4 |  | 41.70 |  |
| LO2 | 47.9 |  | 41.68 |  |
| TO2 | 47.9 |  | 46.7 |  |
| ZO1 | 50.4 |  | 47.6 |  |
| ZO2 | 58.5 |  | 49.1 |  |

**References:**

1 Zheng, Z. *et al.* Ab initio real-time quantum dynamics of charge carriers in momentum space. *Nat. Comput. Sci* **3**, 532-541 (2023).

2 Akimov, A. V. & Prezhdo, O. V. The PYXAID Program for Non-Adiabatic Molecular Dynamics in Condensed Matter Systems. *J. Chem. Theory Comput.* **9**, 4959-4972 (2013).

3 Laasonen, K., Car, R., Lee, C. & Vanderbilt, D. Implementation of ultrasoft pseudopotentials in ab initio molecular dynamics. *Phys. Rev. B* **43**, 6796-6799 (1991).

4 Perdew, J. P., Burke, K. & Ernzerhof, M. Generalized Gradient Approximation Made Simple. *Phys. Rev. Lett.* **77**, 3865-3868 (1996).

5 Mostofi, A. A. *et al.* wannier90: A tool for obtaining maximally-localised Wannier functions. *Comput. Phys. Commun.* **178**, 685-699 (2008).

6 Marzari, N., Mostofi, A. A., Yates, J. R., Souza, I. & Vanderbilt, D. Maximally localized Wannier functions: Theory and applications. *Rev. Mod. Phys.* **84**, 1419-1475 (2012).

7 Zhou, J.-J. *et al.* Perturbo: A software package for ab initio electron–phonon interactions, charge transport and ultrafast dynamics. *Comput. Phys. Commun.* **264**, 107970 (2021).

8 Liu, G.-B., Pang, H., Yao, Y. & Yao, W. Intervalley coupling by quantum dot confinement potentials in monolayer transition metal dichalcogenides. *New J. Phys.* **16**, 105011 (2014).

9 Yu, H., Liu, G.-B. & Yao, W. Brightened spin-triplet interlayer excitons and optical selection rules in van der Waals heterobilayers. *2D Materials* **5**, 035021 (2018).

10 Kormányos, A. *et al.* Monolayer MoS2: Trigonal warping, the Γ valley, and spin-orbit coupling effects. *Phys. Rev. B* **88**, 045416 (2013).

11 Liu, G.-B., Xiao, D., Yao, Y., Xu, X. & Yao, W. Electronic structures and theoretical modelling of two-dimensional group-VIB transition metal dichalcogenides. *Chem. Soc. Rev.* **44**, 2643-2663 (2015).
